# Supplementary material
Source: PubMed Central journal article supplement (PMC3665732)
Supplement: NIHMS444229-supplement-Supp_Table_S1-S2.pdf [file NIHMS444229-supplement-Supp_Table_S1-S2.pdf]

## SUPPLEMENTARY INFORMATION

### **Title:**

Synthesis, antidepressant evaluation and docking studies of long-chain alkylnitroquipazines, inhibitors of the serotonin transporter

### **Authors:**

Mari Gabrielsen, Karol Wołosewicz, Anna Zawadzka, Jerzy Kossakowski, Gabriel Nowak, Małgorzata Wolak, Katarzyna Stachowicz, Agata Siwek, Aina W. Ravna, Irina Kufareva, Lech Kozerski, Elzbieta Bednarek, Jerzy Sitkowski, Wojciech Bocian, Ruben Abagyan, Andrzej J. Bojarski, Ingebrigt Sylte, and Zdzisław Chilmonczyk

### **Figure legends of supplementary material**

**Figure S1.** DPFPG NOE results of **9** x HCl in DMSO-*d*<sub>6</sub> solution. Upper spectrum shows nOe effects and bottom spectrum shows a trace of <sup>1</sup>H NMR in studied solvent. Irradiation of NH signal results in NOE enhancements at marked positions. See assignment in Fig. 2.

Table S1. 5-HT<sub>1A</sub> receptor binding affinities ( $K_i$ , nM) and docking scores (kcal/mol) of **1-12**. The docking scores are based on three parallel docking runs.

| <i>Compound</i> | <i>5-HT<sub>1A</sub> receptor</i> | <i>Docking score</i> |
|-----------------|-----------------------------------|----------------------|
| 6-NQ            | 50800 ± 1900                      | -3.68                |
| <b>1</b>        | 13700 ± 2400                      | -2.75                |
| <b>2</b>        | 18200 ± 300                       | -2.90                |
| <b>3</b>        | 842.3 ± 12.6                      | -4.56                |
| <b>4</b>        | 2900 ± 800                        | -1.94                |
| <b>5</b>        | 2100 ± 400                        | 2.12                 |
| <b>6</b>        | 4900 ± 600                        | -0.10                |
| <b>7</b>        | 1700 ± 100                        | -3.37                |
| <b>8</b>        | 5200 ± 300                        | -0.26                |
| <b>9</b>        | 10600 ± 1800                      | 0.55                 |
| <b>10</b>       | 6700 ± 500                        | 1.46                 |
| <b>11</b>       | 15900 ± 1200                      | 1.48                 |
| <b>12</b>       | 50800 ± 1900                      | 0.98                 |

Table S2: SERT scores (kcal/mol) and localisation of the nitroquinolone moiety.

| <i>Ligand</i> | <i>Score</i> | <i>Nitroquinolone</i> |
|---------------|--------------|-----------------------|
| <b>6-NQ</b>   | -7.44        | Extracellular region  |
| <b>1</b>      | -0.17        | Central region        |
| <b>2</b>      | -6.50        | Extracellular region  |
| <b>3</b>      | -10.04       | Extracellular region  |
| <b>4</b>      | -12.82       | Central region        |
| <b>5</b>      | -16.95       | Central region        |
| <b>6</b>      | -7.15        | Extracellular region  |
| <b>7</b>      | -11.88       | Extracellular region  |
| <b>8</b>      | -8.55        | Extracellular region  |
| <b>9</b>      | -2.55        | Extracellular region  |
| <b>10</b>     | -11.94       | Central region        |
| <b>11</b>     | -0.43        | Extracellular region  |
| <b>12</b>     | -12.68       | Central region        |
