# Supplementary material
Source: PubMed Central journal article supplement (PMC3665732)

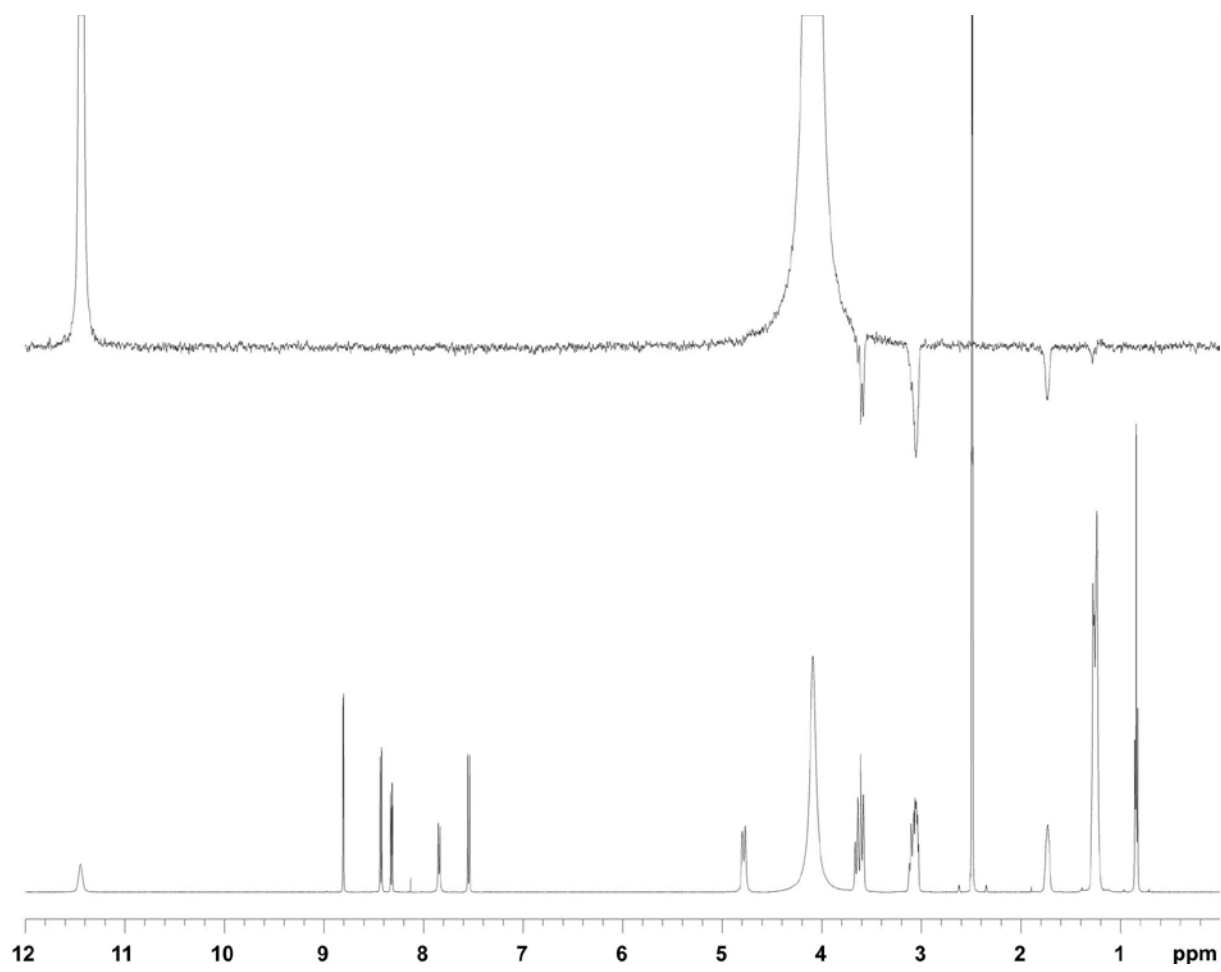

Supplement: NIHMS444229-supplement-Supp_Fig_S1.pdf [file NIHMS444229-supplement-Supp_Fig_S1.pdf]
